# Supplementary material
Source: ML conference proceedings conference paper supplement (https://openaccess.thecvf.com/content/ICCV2025/html/Cao_Boosting_Vision_Semantic_ICCV_2025_paper.html)
Supplement: Supplementary file 1 [file Cao_Boosting_Vision_Semantic_ICCV_2025_supplemental.pdf]

# Boosting Vision Semantic Density with Anatomy Normality Modeling for Medical Vision-language Pre-training

## Supplementary Material

### 6. More ablation studies

#### 6.1. Variety in visual encoder selection

In the 3D CT VLP task, we discover that the CNN visual encoder outperforms the ViT. Consequently, we explore the impact of various CNN backbones on model performance. As illustrated in Table 6, both ResNet34 and ResNet50 demonstrate improved performance compared to ResNet18. However, considering the balance between computational cost and performance, we decide to utilize ResNet18 as the primary visual encoder in this study.

#### 6.2. Different initializations for visual encoders

Aligned with Figure 3, Table 7 provides a numerical comparison of different initialization methods for visual encoder. The table clearly shows that the model initialized with weights derived from our proposed disease-level contrastive learning method achieves the highest AUC, outperforming the other two initialization approaches. These quantitative results further underscore the effectiveness of the proposed visual semantic enhancement.

#### 6.3. Experiments on local and diffuse diseases

We assessed the improvement offered by the proposed model over the baseline model in diagnosing both local and diffuse diseases. A radiologist categorizes these abnormalities into local and diffuse diseases, as listed in Table 9. Detailed performances are presented in Table 8. As indicated in the table, there is a 4.0% increase in the AUC for local diseases, which surpasses the 2.8% improvement seen in diffuse diseases. This suggests that our approach significantly improves the model’s ability to diagnose localized diseases.

### 7. More implementation details

For the MedVL-CT69K dataset, we utilize the pre-trained BERT-base [11] as the text encoder. Our ViSD-boost is trained with the Adam optimizer, where the learning rate increases linearly to  $1e-4$  in the first epoch and then decreases gradually to  $1e-6$  via a cosine decay scheduler. The model is trained over four phases for 60, 30, 60, and 30 epochs, utilizing 4 A100 GPUs and a batch size of 48. During training, we dynamically apply RandomCrop and RandomFlip augmentations. For the chest CT-RATE dataset, we employ the same image pre-processing methodology as CT-CLIP [14] to ensure a fair comparison with other methods. We also use the same CXR-Bert as the text encoder [14]. Furthermore,

| Methods  | SE   | SP   | ACC  | AUC  |
|----------|------|------|------|------|
| ResNet18 | 73.6 | 75.9 | 74.8 | 78.7 |
| ResNet34 | 74.8 | 76.1 | 75.5 | 78.9 |
| ResNet50 | 76.0 | 75.3 | 75.7 | 79.0 |

Table 6. Zero-shot performance comparison of different vision encoders on MedVL-CT69K validation set.

| Methods                  | SE   | SP   | ACC  | AUC  |
|--------------------------|------|------|------|------|
| Random                   | 75.9 | 73.6 | 74.8 | 78.7 |
| Supervised               | 76.4 | 75.4 | 75.9 | 79.4 |
| Ours (Disease-level CLP) | 77.9 | 76.6 | 77.3 | 80.7 |

Table 7. Zero-shot performance comparison of different initialization solutions for vision encoder on MedVL-CT69K validation set. CLP: Contrastive Learning Pre-training.

| Types   | Methods | SE   | SP   | ACC  | AUC  | $\Delta$ |
|---------|---------|------|------|------|------|----------|
| Local   | Base    | 72.5 | 70.9 | 71.7 | 76.3 | 4.0      |
|         | Ours    | 75.4 | 74.5 | 75.0 | 80.3 |          |
| Diffuse | Base    | 78.7 | 81.7 | 80.2 | 85.2 | 2.8      |
|         | Ours    | 82.1 | 83.1 | 82.6 | 88.0 |          |

Table 8. Comparison between the base model and our model regarding performance improvements in local and diffuse diseases.

in line with the fVLM [35], we adopt the same anatomy and report parsing methods, facilitating anatomy-wise image-report alignment.

### 8. More visualizations of semantic density

We present the distributions of visual tokens across additional anatomical structures, as illustrated in Figure 6. The figure clearly demonstrates that, for all organs, the visual tokens of the model exhibit increased sparsity after the implementation of VSDB, indicating that the model is prioritizing more important features.

### 9. Details about zero-shot performance

Table 10 displays the zero-shot performance of the proposed method across 54 abnormalities spanning 15 distinct anatomies.

| Type    | Diseases                                                                                                                                                                                                                                                                                                                                                                                                                                                                                                                                                                                                                                                                 |
|---------|--------------------------------------------------------------------------------------------------------------------------------------------------------------------------------------------------------------------------------------------------------------------------------------------------------------------------------------------------------------------------------------------------------------------------------------------------------------------------------------------------------------------------------------------------------------------------------------------------------------------------------------------------------------------------|
| Local   | kidney cyst, kidney stone, adrenal gland nodule, stomach cancer, gallstone, pancreatic cancer, small intestine diverticulum, small intestine intussusception, colon cancer, rectal cancer, colon diverticulum, colon appendicolith, liver cyst, liver cancer, liver abscess, liver metastase, spleen infarction, spleen hemangioma, bladder diverticulum, bladder stone, esophageal varicose veins, sacrum osteitis                                                                                                                                                                                                                                                      |
| Diffuse | colon obstruction, colonic gas, colon effusion, colon appendicitis, small intestine obstruction, small intestine gas, small intestine fluid accumulation, cardiomegaly, pericardial effusion, liver glisson's capsule effusion, liver cirrhosis, intrahepatic bile duct dilatation, fatty liver, bronchiectasis, emphysema, pneumonia, pleural effusion, atelectasis, kidney atrophy, hydronephrosis, adrenal hypertrophy, gastric wall thickening, cholecystitis, pancreatitis, pancreatic duct dilatation, pancreas steatosis, pancreas atrophy, splenomegaly, portal vein hypertension, portal vein thrombosis, esophageal hiatal hernia, gallbladder adenomyomatosis |

Table 9. Classification of local and diffuse diseases.

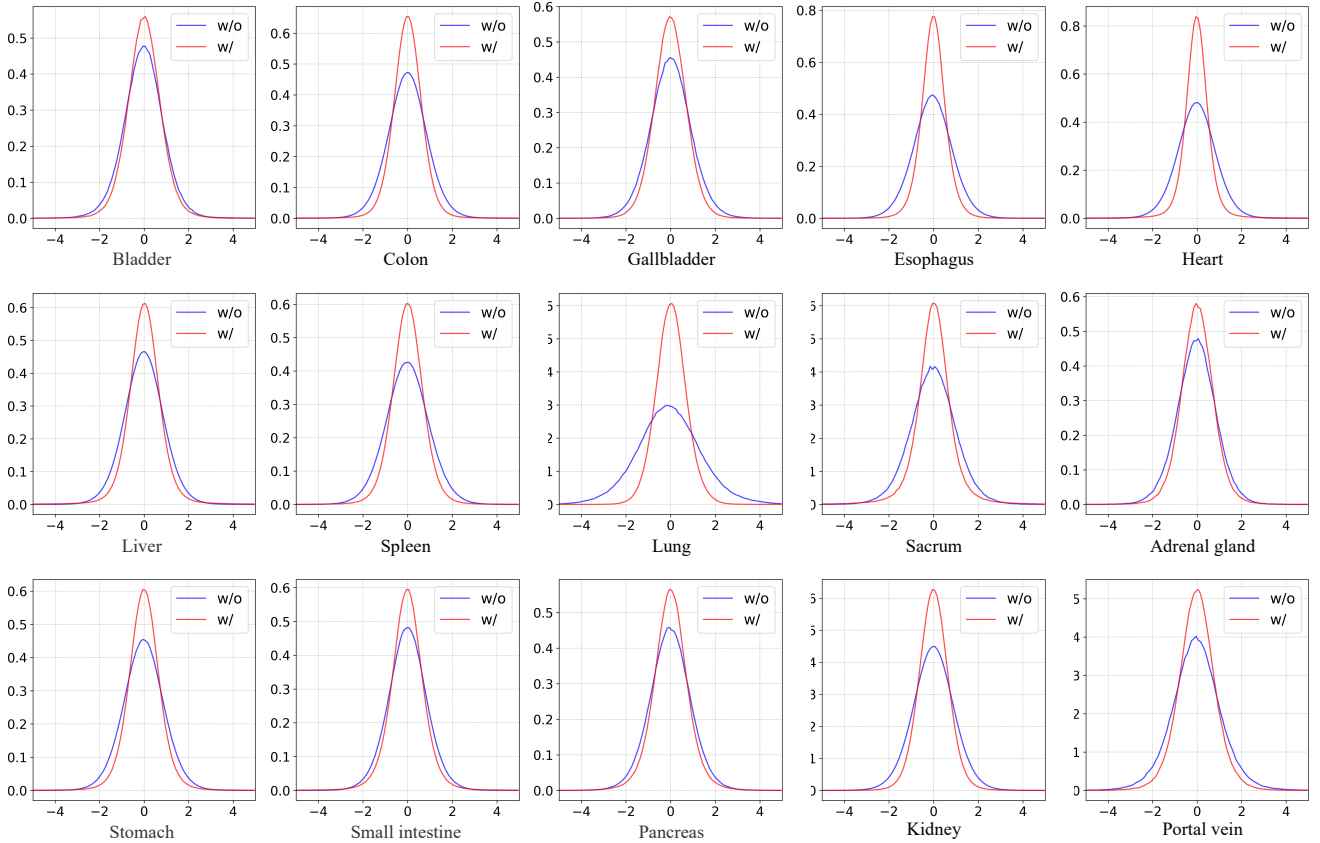

Figure 6. Vision semantic density comparison between models w/ and w/o VSDB.

| Anatomy         | Abnormality                                                                                                                           | SE    | SP   | ACC  | AUC  |
|-----------------|---------------------------------------------------------------------------------------------------------------------------------------|-------|------|------|------|
| Adrenal gland   | Adrenal Hypertrophy<br>Nodule                                                                                                         | 61.5  | 66.3 | 63.9 | 68.0 |
|                 |                                                                                                                                       | 65.5  | 63.6 | 64.6 | 68.9 |
| Bladder         | Diverticulum<br>Stones                                                                                                                | 71.4  | 78.8 | 75.1 | 81.6 |
|                 |                                                                                                                                       | 78.6  | 69.9 | 74.2 | 80.9 |
| Colon           | Colonic Gas<br>Effusion<br>Obstruction<br>Diverticulum<br>Colon Cancer<br>Rectal Cancer<br>Appendicitis<br>Appendicolith              | 74.4  | 81.5 | 78.0 | 85.3 |
|                 |                                                                                                                                       | 80.0  | 81.8 | 80.9 | 85.3 |
|                 |                                                                                                                                       | 100   | 95.4 | 97.7 | 99.3 |
|                 |                                                                                                                                       | 75.0  | 61.1 | 68.0 | 72.3 |
|                 |                                                                                                                                       | 77.1  | 68.8 | 72.9 | 80.8 |
|                 |                                                                                                                                       | 80.8  | 88.7 | 84.8 | 92.9 |
|                 |                                                                                                                                       | 68.4  | 75.3 | 71.9 | 75.8 |
|                 |                                                                                                                                       | 64.9  | 57.9 | 61.4 | 63.7 |
| Esophagus       | Hiatal Hernia<br>Varicose Veins                                                                                                       | 100.0 | 88.3 | 94.2 | 96.9 |
|                 |                                                                                                                                       | 98.7  | 97.1 | 97.9 | 99.6 |
| Gallbladder     | Cholecystitis<br>Gallstone<br>Adenomyomatosis                                                                                         | 67.1  | 69.7 | 68.4 | 74.4 |
|                 |                                                                                                                                       | 68.2  | 79.4 | 73.8 | 80.4 |
|                 |                                                                                                                                       | 61.7  | 60.0 | 60.9 | 63.0 |
| Heart           | Cardiomegaly<br>Pericardial Effusion                                                                                                  | 90.0  | 91.4 | 90.7 | 97.0 |
|                 |                                                                                                                                       | 79.2  | 74.1 | 76.6 | 84.1 |
| Kidney          | Atrophy<br>Cyst<br>Hydronephrosis<br>Renal Calculus                                                                                   | 78.4  | 89.6 | 84.0 | 89.5 |
|                 |                                                                                                                                       | 62.7  | 62.2 | 62.5 | 67.5 |
|                 |                                                                                                                                       | 85.1  | 84.4 | 84.7 | 89.9 |
|                 |                                                                                                                                       | 63.5  | 61.9 | 62.7 | 67.1 |
| Liver           | Fatty Liver<br>Glisson's Capsule Effusion<br>Metastase<br>Intrahepatic Bile Duct Dilatation<br>Cancer<br>Cyst<br>Abscess<br>Cirrhosis | 84.0  | 78.4 | 81.2 | 90.4 |
|                 |                                                                                                                                       | 89.7  | 84.8 | 87.2 | 93.8 |
|                 |                                                                                                                                       | 73.8  | 82.8 | 78.3 | 86.4 |
|                 |                                                                                                                                       | 74.6  | 73.1 | 73.9 | 80.4 |
|                 |                                                                                                                                       | 86.9  | 89.3 | 88.1 | 93.8 |
|                 |                                                                                                                                       | 61.0  | 54.3 | 57.6 | 61.0 |
|                 |                                                                                                                                       | 66.7  | 92.7 | 79.7 | 85.6 |
|                 |                                                                                                                                       | 90.4  | 87.2 | 88.8 | 96.0 |
| Lung            | Atelectasis<br>Bronchiectasis<br>Emphysema<br>Pneumonia<br>Pleural Effusion                                                           | 95.6  | 95.9 | 95.8 | 99.0 |
|                 |                                                                                                                                       | 94.4  | 85.6 | 90.0 | 96.2 |
|                 |                                                                                                                                       | 80.0  | 79.7 | 79.8 | 79.0 |
|                 |                                                                                                                                       | 81.1  | 82.0 | 81.6 | 88.9 |
|                 |                                                                                                                                       | 95.7  | 95.8 | 95.7 | 98.2 |
| Pancreas        | Pancreatic Cancer<br>Atrophy<br>Pancreatitis<br>Pancreatic Duct Dilatation<br>Steatosis                                               | 93.1  | 82.6 | 87.8 | 94.7 |
|                 |                                                                                                                                       | 83.8  | 86.1 | 84.9 | 91.1 |
|                 |                                                                                                                                       | 85.7  | 93.6 | 89.6 | 95.2 |
|                 |                                                                                                                                       | 58.5  | 84.7 | 71.6 | 77.8 |
|                 |                                                                                                                                       | 82.2  | 78.8 | 80.5 | 85.7 |
| Portal vein     | Hypertension<br>Thrombosis                                                                                                            | 94.4  | 90.8 | 92.6 | 97.9 |
|                 |                                                                                                                                       | 90.9  | 94.5 | 92.7 | 96.7 |
| Small Intestine | Gas Accumulation<br>Fluid Accumulation<br>Obstruction<br>Diverticulum<br>Intussusception                                              | 81.9  | 83.2 | 82.6 | 89.3 |
|                 |                                                                                                                                       | 80.3  | 82.3 | 81.3 | 87.9 |
|                 |                                                                                                                                       | 85.2  | 86.9 | 86.1 | 92.9 |
|                 |                                                                                                                                       | 84.1  | 77.1 | 80.6 | 88.2 |
|                 |                                                                                                                                       | 88.9  | 66.1 | 77.5 | 83.4 |
| Spleen          | Hemangioma<br>Infarction<br>Splenomegaly                                                                                              | 68.1  | 65.9 | 67.0 | 69.4 |
|                 |                                                                                                                                       | 81.8  | 81.9 | 81.9 | 87.5 |
|                 |                                                                                                                                       | 84.7  | 83.6 | 84.1 | 91.8 |
| Stomach         | Gastric Wall Thickening<br>Gastric Cancer                                                                                             | 67.5  | 74.4 | 70.9 | 77.7 |
|                 |                                                                                                                                       | 78.6  | 80.3 | 79.5 | 84.5 |
| Sacrum          | Osteiti                                                                                                                               | 70.6  | 75.7 | 73.2 | 77.5 |
| Average         |                                                                                                                                       | 79.4  | 79.6 | 79.5 | 84.9 |

Table 10. Detailed zero-shot performance of our method on each abnormality.
